# Supplementary material for: Cuboctahedral Pd13 as a spherical aromatic noble metal core: insights from a ligand-protected [Pd13(Tr)6]2+ cluster
Source: Royal Society of Chemistry journal article supplement (doi:10.1039/d4dt01633e), 2024-01-01
Supplement: d4dt01633e1.pdf [file d4dt01633e1.pdf]

Supporting information for:

# Cuboctahedral Pd<sub>13</sub> as a spherical Aromatic Noble Metal Core. Insights from ligand-protected [Pd<sub>13</sub>(Tr)<sub>6</sub>]<sup>2+</sup> Cluster

Jiangu Wei,<sup>a</sup> Peter L. Rodríguez-Kessler,<sup>b</sup> Jean-Yves Saillard,<sup>c\*</sup> and Alvaro Muñoz-Castro<sup>d\*</sup>

<sup>a</sup>*School of Materials and New Energy, Ningxia University, Yinchuan, Ningxia 750021, China.*

<sup>b</sup>*Centro de Investigaciones en Óptica A.C., Loma del Bosque 115, Col. Lomas del Campestre, León, Guanajuato, 37150, Mexico.*

<sup>c</sup>*Institut des Sciences Chimiques de Rennes, Univ Rennes, CNRS, UMR 6226, Rennes F-35000, France*

<sup>d</sup>*Facultad de Ingeniería, Arquitectura y Diseño, Universidad San Sebastián, Bellavista 7, Santiago, 8420524, Chile.*

saillard@univ-rennes1.fr

alvaro.munozc@uss.cl

## Content

Table S1. Energy decomposition analysis for Tr<sup>+</sup>-[Pd<sub>12</sub>(Tr)<sub>5</sub>]<sup>+</sup> interaction. Values in kcal/mol.

Page S2

Table S2. Energy decomposition analysis for Pd-[Pd<sub>12</sub>(Tr)<sub>6</sub>]<sup>2+</sup> interaction. Values in kcal/mol.

Page S2

Table S3. Energy decomposition analysis for Tr<sup>+</sup>-[Pd<sub>12</sub>(Tr)<sub>5</sub>]<sup>+</sup>, Bz-[Pd<sub>12</sub>(Tr)<sub>5</sub>]<sup>+</sup>, Tr<sup>+</sup>-[Pd<sub>12</sub>(Bz)<sub>5</sub>]<sup>4+</sup>, and Bz-[Pd<sub>12</sub>(Bz)<sub>5</sub>]<sup>4+</sup> interaction. Values in kcal/mol.

Page S3

Figure S1. Complete description of density deformation channels,  $\Delta\rho$ , for the Pd-[Pd<sub>12</sub>(Tr)<sub>6</sub>]<sup>2+</sup> interaction. Density flow from red to blue isosurfaces. Isosurface value set at 0.001 a.u..

Page S3

Table S1. Energy decomposition analysis for  $\text{Tr}^+ - [\text{Pd}_{12}(\text{Tr})_5]^+$  interaction. Values in kcal/mol.

|                            |        |       |
|----------------------------|--------|-------|
| $\Delta E_{\text{Pauli}}$  | 404.4  |       |
| $\Delta E_{\text{elstat}}$ | -198.2 | 42.6% |
| $\Delta E_{\text{orb}}$    | -248.2 | 53.3% |
| $\Delta E_{\text{disp}}$   | -19.0  | 4.1%  |
|                            |        |       |
| $\Delta E_{\text{int}}$    | -61.0  |       |
|                            |        |       |
| $\Delta \rho_1$            | -80.5  | 32.4% |
| $\Delta \rho_2$            | -66.1  | 26.6% |
| $\Delta \rho_3$            | -13.4  | 5.4%  |
| $\Delta \rho_4$            | -10.4  | 4.2%  |

Table S2. Energy decomposition analysis for  $\text{Pd} - [\text{Pd}_{12}(\text{Tr})_6]^{2+}$  interaction. Values in kcal/mol.

|                            |        |       |
|----------------------------|--------|-------|
| $\Delta E_{\text{Pauli}}$  | 429.6  |       |
| $\Delta E_{\text{elstat}}$ | -432.6 | 77.6% |
| $\Delta E_{\text{orb}}$    | -108.4 | 19.4% |
| $\Delta E_{\text{disp}}$   | -16.4  | 2.9%  |
|                            |        |       |
| $\Delta E_{\text{int}}$    | -127.8 |       |
|                            |        |       |
| $\Delta \rho_1$            | -17.0  | 15.7% |
| $\Delta \rho_2$            | -14.9  | 13.8% |
| $\Delta \rho_3$            | -16.1  | 14.8% |
| $\Delta \rho_4$            | -15.5  | 14.3% |
| $\Delta \rho_5$            | -15.1  | 13.9% |
| $\Delta \rho_6$            | -9.3   | 8.6%  |
| $\Delta \rho_7$            | -3.0   | 2.8%  |
| $\Delta \rho_8$            | -3.0   | 2.8%  |
| $\Delta \rho_9$            | -3.0   | 2.8%  |

Table S3. Energy decomposition analysis for  $\text{Tr}^+[\text{Pd}_{12}(\text{Tr})_5]^+$ ,  $\text{Bz}[\text{Pd}_{12}(\text{Tr})_5]^+$ ,  $\text{Tr}^+[\text{Pd}_{12}(\text{Bz})_5]^+$ , and  $\text{Bz}[\text{Pd}_{12}(\text{Bz})_5]^+$  interaction. Values in kcal/mol.

|                            | $\text{Tr}^+[\text{Pd}_{12}(\text{Tr})_5]^+$ |       | $\text{Bz}[\text{Pd}_{12}(\text{Tr})_5]^+$ |       | $\text{Tr}^+[\text{Pd}_{12}(\text{Bz})_5]^+$ |       | $\text{Bz}[\text{Pd}_{12}(\text{Bz})_5]^+$ |       |
|----------------------------|----------------------------------------------|-------|--------------------------------------------|-------|----------------------------------------------|-------|--------------------------------------------|-------|
| $\Delta E_{\text{Pauli}}$  | 404.4                                        |       | 356.5                                      |       | 647.1                                        |       | 527.7                                      |       |
| $\Delta E_{\text{elstat}}$ | -198.2                                       | 42.6% | -245.1                                     | 60.2% | -641.4                                       | 62.6% | -349.0                                     | 62.1% |
| $\Delta E_{\text{orb}}$    | -248.2                                       | 53.3% | -145.3                                     | 35.7% | -364.8                                       | 35.6% | -197.3                                     | 35.1% |
| $\Delta E_{\text{disp}}$   | -19.0                                        | 4.1%  | -16.8                                      | 4.1%  | -18.2                                        | 1.8%  | -15.9                                      | 2.8%  |
| $\Delta E_{\text{int}}$    | -61.0                                        |       | -50.7                                      |       | -377.4                                       |       | -34.4                                      |       |

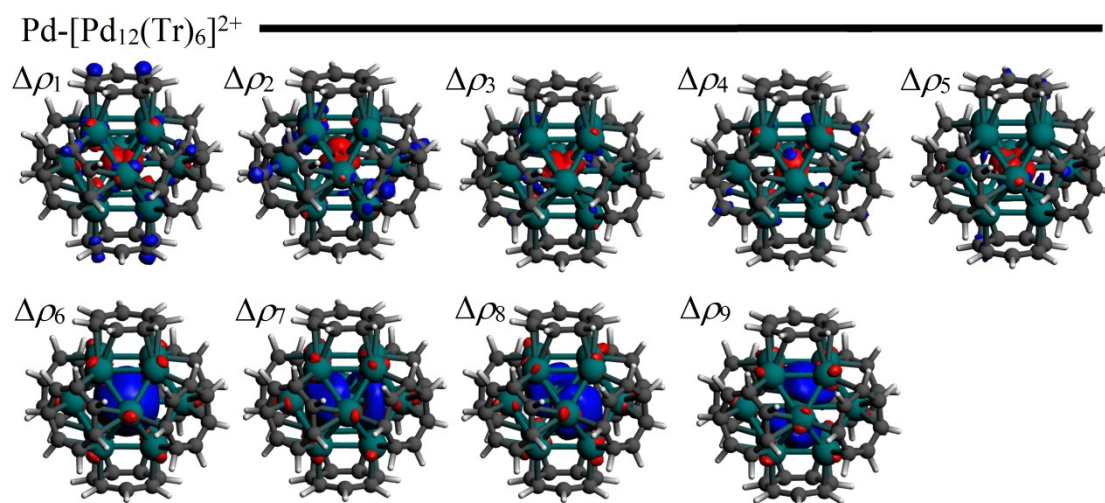

Figure S1. Complete description of density deformation channels,  $\Delta\rho_i$ , for the  $\text{Pd}[\text{Pd}_{12}(\text{Tr})_6]^{2+}$  interaction. Density flow from red to blue isosurfaces. Isosurface value set at 0.001 a.u..
